# Supplementary material for: 2023 Survey on User Experience of Artificial Intelligence Software in Radiology by the Korean Society of Radiology
Source: PubMed Central journal article supplement — Korean J Radiol. 2024 Jun 20;25(7):613–22. doi: 10.3348/kjr.2023.1246 (PMC11214921; doi:10.3348/kjr.2023.1246), 2024-06-20
Supplement: kjr-25-613-s001.pdf [file kjr-25-613-s001.pdf]

## SUPPLEMENTS

### Supplementary item 1. Full Questionnaire Translated into English

#### Section 1. Experience and Patterns of Practice

Question 1. What is your experience as a radiologist?

- ① Residency trainee
- ② Less than five years of experience as a board-certified radiologist
- ③ Five to ten years of experience as a board-certified radiologist
- ④ Ten to fifteen years of experience as a board-certified radiologist
- ⑤ Fifteen or more years of experience as a board-certified radiologist

Question 2. Which of the following types of institutions are you affiliated with?

- ① Primary institution
- ② Secondary institution
- ③ Tertiary, training institution
- ④ Tertiary, non-training institution
- ⑤ Military service or public healthcare service
- ⑥ Others

Question 3. What is your primary field of practice? (multiple responses allowed)

- ① General radiology (no subspecialty field)
- ② Musculoskeletal radiology
- ③ Abdominal radiology
- ④ Neuroradiology
- ⑤ Breast radiology
- ⑥ Chest radiology
- ⑦ Cardiovascular radiology
- ⑧ Interventional radiology
- ⑨ Genitourinary radiology
- ⑩ Pediatric radiology
- ⑪ Emergency radiology
- ⑫ Others

#### Section 2. Experience in Using Artificial Intelligence-Based Software as Medical Devices (AI-SaMDs)

Question 4. Do you have any experience in using AI-SaMD in your clinical practice or research?

- ① Yes
- ② No

#### *Questions for Respondents with Experience in Using AI-SaMD*

Question 5. How many AI-SaMDs have you used?

- ① One
- ② Two
- ③ Three or more

Question 6. Which type of AI-SaMD have you used? (multiple responses allowed)

- ① AI-SaMD approved by the Ministry of Food and Drug Safety for clinical use
- ② Use of AI-SaMD for research purposes before approval for clinical use

Question 7. What is the name of the AI-SaMD that you have used? (multiple responses allowed)

Question 8. In which of the following cases have you used AI-SaMD? (multiple responses allowed)

- ① Assistance for the detection of radiological findings
- ② Assistance for diagnosis
- ③ Assistance for measurement or quantification
- ④ Improvement of image quality
- ⑤ Reduction of image acquisition time
- ⑥ Prioritization of image interpretation
- ⑦ Others

Question 9. How long have you been using AI-SaMDs? (multiple responses allowed)

- ① Less than six months
- ② Six months to one year
- ③ One to two years
- ④ Two to three years
- ⑤ Three years or longer

Question 10. What target imaging modality did you use AI-SaMD for? (multiple responses allowed)

- ① Plain radiography
- ② CT
- ③ MRI
- ④ Ultrasonography
- ⑤ Mammography
- ⑥ Others

Question 11. What was your motivation for using AI-SaMD? (multiple responses allowed)

- ① To improve the quality of practice
- ② To improve the efficiency of practice
- ③ To experience the clinical performance of AI-SaMD
- ④ Purchase by the institution
- ⑤ To conduct research using AI-SaMD
- ⑥ Others

Question 12. To what degree is AI-SaMD integrated into the picture archiving and communication system (PACS) of the institution?

- ① All AI results were sent to the PACS. Access to a separate workstation is not required
- ② Summaries of the AI results were sent to a PACS. Access to a separate workstation is required to obtain the full AI results
- ③ Access to a separate workstation is required to check AI results

Question 13. What is the primary reason for the limited integration of AI-SaMD into the PACS?

- ① Technical difficulty of integration
- ② Institutional policy
- ③ Financial issues
- ④ Unknown
- ⑤ Others

Question 14. What is your level of satisfaction with AI-SaMD for the following items? (totally satisfied, generally satisfied, generally dissatisfied, or totally dissatisfied)

- ① Performance of AI-SaMD
- ② Convenience of use
- ③ Improvement of practice quality
- ④ Improvement of practice efficiency
- ⑤ Quantitative image analysis
- ⑥ Improvement of patient management
- ⑦ Improvement of image quality
- ⑧ Utilization for research

Question 15. Will you continue to use AI-SaMD?

- ① I am currently using AI-SaMD and plan to continue to use it
- ② I am currently using AI-SaMD, but plan to stop using it
- ③ I used AI-SaMD in the past but do not currently use it

Question 16. What is the primary reason for discontinuing the use of AI-SaMD? (multiple responses allowed)

- ① License expiration
- ② Dissatisfaction with AI-SaMD performance
- ③ Inconvenience of using AI-SaMD
- ④ Clinical ineffectiveness of AI-SaMD
- ⑤ Others

### ***Questions for Respondents without Experience in Using AI-SaMD***

Question 17. What are the primary reasons for not using AI-SaMD? (multiple responses allowed)

- ① Not purchased by the institution
- ② High cost of purchasing AI-SaMD
- ③ Cumbersome process of purchasing and installing AI-SaMD
- ④ Inconvenience of using AI-SaMD
- ⑤ Clinical ineffectiveness of AI-SaMD
- ⑥ Negative effects of using AI-SaMD (e.g., increased complaints from clinicians or patients and excessive false-positive results)
- ⑦ Others

Question 18. Are you willing to use AI-SaMD in the future?

- ① I am willing to use AI-SaMD currently
- ② I am not willing to use AI-SaMD currently, but I am willing to use it if performance or circumstances are improved
- ③ I am not willing to use AI-SaMD

### Section 3. Opinions on the Roles of the Manufacturer, Government, and Radiological Society Regarding the Clinical Use of AI-SaMDs

Question 19. What challenges do you think should be solved to use AI-SaMD in clinical practice? (a maximum of three responses allowed)

- ① Performance improvement of AI-SaMD
- ② Improvement of PACS integration and convenience of use
- ③ Establishment of high-level evidence for the effectiveness of AI-SaMD
- ④ Reimbursement for using AI-SaMD
- ⑤ Reduction of price of AI-SaMD
- ⑥ Clarification of legal liability issues regarding the use of AI-SaMD

Question 20. What applications of AI-SaMD do you think should be expanded upon? (a maximum of four responses allowed)

- ① Assistance of image interpretation through the detection of abnormality and prediction of diagnosis
- ② Provision of quantitative information through automated quantitative image analysis
- ③ Reduction of workload through automated interpretation
- ④ Improvement of image quality
- ⑤ Reduction of image acquisition time
- ⑥ Prioritization of image interpretation
- ⑦ Quality control through the screening of interpretation errors
- ⑧ Others

Question 21. What aspects do you think should be the focus during future developments of AI-SaMD? (a maximum of three responses allowed)

- ① Improvement of practice quality
- ② Improvement of practice efficiency and reduction of workload
- ③ Improvement of image quality
- ④ Provision of novel information through quantitative image analysis
- ⑤ Improvement of patient management
- ⑥ Utilization for research

Question 22. Do you think there is a need for education or guidelines from the Korean Society of Radiology (KSR) regarding the use of AI-SaMD in clinical practice?

- ① Yes
- ② No

Question 23. What do you think should be included in the education or guidelines from the KSR on using AI-SaMD in clinical practice? (multiple responses allowed)

- ① Introduction to the available AI-SaMDs
- ② Objective information on the performance of AI-SaMDs
- ③ Practical experience in purchasing, installing, and using AI-SaMDs
- ④ Recommendations on the use of AI-SaMDs in various application scenarios
- ⑤ Guidelines for purchasing, installing, and using AI-SaMDs for various application scenarios
- ⑥ Others

## Supplementary item 2. Original Questionnaire in Korean

### 인공지능 기반 의료 영상 분석 의료기기 사용 경험 관련 설문 조사

대한영상의학회 임상연구네트워크(Radiology Imaging Network of Korea for Clinical Research, RINK-CR)에서는 점차 임상 적용이 확대되고 있는 인공지능 기반 영상 분석 의료기기에 대한 회원 여러분의 경험 및 인식을 알아보기 위해 간단한 설문 조사를 준비하였습니다. 조사 결과는 인공지능 의료기기가 환자들과 영상의학과 의사들 모두에게 도움이 되는 방향으로 활용될 수 있도록 안내하는데 중요한 근거 자료가 될 것이며, 설문 조사 결과는 대한영상의학회 회원 여러분들에게 공개될 예정입니다. 여러 일로 바쁘시겠지만 잠시 시간을 내주시어 설문에 응답해 주시면 대단히 감사하겠습니다.

설문 조사는 총 3개의 Part로 구성되어 있고, 응답에 예상되는 소요 시간은 약 10-15분입니다.

#### Part 1 (공통 질문)

1-1. 영상의학과 전문의로서 귀하의 진료 경험은 다음 중 어느 정도이십니까?

- ① 전공의
- ② 전문의 취득 후 5년 이내
- ③ 전문의 취득 후 5-10년
- ④ 전문의 취득 후 10-15년
- ⑤ 전문의 취득 후 15년 이상

1-2. 현재 귀하께서 소속되어 계신 의료기관은 다음 중 어디에 속하십니까?

- ① 의원
- ② 병원
- ③ 수련병원
- ④ 수련병원 외 종합병원
- ⑤ 외주 판독 전문 기관
- ⑥ 군의관/공중보건의
- ⑦ 기타: \_\_\_\_\_

1-3. 귀하께서 소속되어 계신 의료기관의 이름을 답해 주십시오. 답변이 어려우시다면 의료기관이 위치한 지역을 답해 주십시오.

\_\_\_\_\_

1-4. 귀하의 해당하는 세부 진료 분야는 다음 중 무엇입니까? (복수 응답 가능)

- ① 일반 영상의학(세부 진료 분야 없음)
- ② 근골격 영상의학
- ③ 복부 영상의학
- ④ 비뇨생식기계 영상의학
- ⑤ 소아영상의학
- ⑥ 신경두경부 영상의학
- ⑦ 심혈관 영상의학
- ⑧ 유방 영상의학
- ⑨ 응급영상의학
- ⑩ 인터벤션 영상의학

⑪ 흉부 영상의학

⑫ 기타: \_\_\_\_\_

1-5. 귀하께서는 진료나 연구를 위하여 인공지능 기반 영상 분석 의료기기를 사용해 본 경험이 있으십니까?

① 있다 → Part 2-1 문항으로(인공지능 의료기기 사용 경험이 있는 응답자)

② 없다 → Part 2-2 문항으로(인공지능 의료기기 사용 경험이 없는 응답자)

**Part 2-1 (인공지능 의료기기 사용 경험이 있는 응답자)**

2-1. 귀하께서 현재까지 진료나 연구에 사용해 보신 인공지능 영상 분석 의료기기는 몇 개입니까?

① 1개

② 2개

③ 3개 이상

2-2. 귀하께서 사용해 보신 인공지능 영상 분석 의료기기는 다음 중 어디에 해당하였습니까? (복수 응답 가능)

① 식품의약품안전처로부터 의료기기 승인을 받은 상용화 의료기기

② 식품의약품안전처 승인을 받기 전 연구 단계의 의료기기

2-3. 귀하께서 사용해 보신 인공지능 영상 분석 의료기기의 제품명을 답해 주십시오. (최대 5개)

---

---

---

---

---

2-4. 귀하께서 사용해 보신 인공지능 영상 분석 의료기기의 기능은 다음 중 무엇에 해당합니까? (복수 응답 가능)

① 병변 검출 보조

② 진단 보조

③ 병변/장기 측정 및 정량화 보조

④ 영상 화질 개선

⑤ 영상 촬영 속도 단축

⑥ 판독 우선순위 조정

⑦ 기타: \_\_\_\_\_

2-5. 인공지능 영상 분석 의료기기를 얼마나 오래 사용하셨습니다?

① 6개월 미만

② 6개월-1년

③ 1년-2년

④ 2년-3년

⑤ 3년 이상

2-6. 귀하께서 사용해 보신 인공지능 영상 분석 의료기기의 적용 영상 종류는 다음 중 무엇입니까? (복수 응답 가능)

- ① 일반 X선 촬영
- ② CT
- ③ MRI
- ④ 초음파
- ⑤ 유방촬영
- ⑥ 기타: \_\_\_\_\_

2-7. 귀하께서 인공지능 영상 분석 의료기기를 사용하게 된 동기는 무엇입니까? (복수 응답 가능)

- ① 진료(판독)의 정확도, 질을 높이기 위해서
- ② 진료(판독)의 효율성, 속도를 높이기 위해서
- ③ 인공지능 의료기기의 실제 성능을 경험해 보기 위해서
- ④ 소속된 의료기관에서 구매/제공해 주어서
- ⑤ 인공지능 의료기기를 활용한 연구를 수행하기 위해서
- ⑥ 기타: \_\_\_\_\_

2-8. 귀하께서 사용하신 인공지능 의료기기는 의료기관 picture archiving and communication system (PACS)에 어느 정도로 통합되어 있었습니까?

- ① 인공지능 분석 결과가 PACS로 모두 전송되어 별도의 워크스테이션/서버에 접근할 필요가 없음(→ 2-9. 문항으로)
- ② 인공지능 분석 결과의 요약/보고서가 PACS로 전송되나 상세한 결과 확인을 위해서는 별도의 워크스테이션/서버에 접근해야 함(→ 2-8-1. 문항으로)
- ③ 인공지능 분석 결과 확인을 위해서 PACS 외에 별도의 워크스테이션/서버에 접근이 불가피함(→ 2-8-1. 문항으로)

2-8-1. 인공지능 의료기기가 의료기관 PACS에 통합되지 않았다면, 가장 큰 이유는 무엇입니까?

- ① 인공지능 의료기기가 PACS 통합을 지원하지 않거나 기술적으로 어려움
- ② 병원 내 제도 미비(보안, IRB 등)
- ③ 재정적 이유
- ④ 모름
- ⑤ 기타: \_\_\_\_\_

2-9. 아래의 항목들에 대하여 사용하신 영상 분석 의료기기에 대한 만족도는 어느 정도이십니까?

|                  | 매우 불만족 | 대체로 불만족 | 대체로 만족 | 매우 만족 | 해당 없음 |
|------------------|--------|---------|--------|-------|-------|
| 인공지능 성능 및 신뢰도    |        |         |        |       |       |
| 사용 편의성           |        |         |        |       |       |
| 판독 정확도, 판독 질 향상  |        |         |        |       |       |
| 판독 효율성, 속도 향상    |        |         |        |       |       |
| 정량적 분석을 통한 정보 제공 |        |         |        |       |       |
| 환자 진료 시스템 개선     |        |         |        |       |       |
| 영상 화질 개선         |        |         |        |       |       |
| 연구에 활용           |        |         |        |       |       |

2-10. 귀하께서는 인공지능 영상 분석 의료기기를 계속 사용 중이거나 사용하실 계획이십니까?

- ① 현재 인공지능 의료기기를 사용하고 있고 앞으로도 계속 사용할 계획임(→ Part 3. 문항으로)
- ② 현재 인공지능 의료기기를 사용하고 있으나 곧 사용을 중단할 계획임(→ 2-10-1. 문항으로)
- ③ 과거 인공지능 의료기기를 사용하였으나 현재는 사용하고 있지 않음(→ 2-10-1. 문항으로)

2-10-1. 귀하께서 인공지능 영상 분석 의료기기 사용을 중단하셨거나 중단을 계획하시는 이유는 무엇입니까?

(복수 응답 가능)

- ① 사용 기간이 만료되어서
- ② 인공지능 의료기기의 성능이 불만족스러워서
- ③ 인공지능 의료기기의 사용이 불편해서
- ④ 인공지능 의료기기의 사용이 진료에 도움이 되지 않아서
- ⑤ 기타: \_\_\_\_\_

**Part 3 (공통 질문)으로**

**Part 2-2 (인공지능 의료기기 사용 경험이 없는 응답자)**

2-1. 귀하께서 인공지능 의료기기를 사용하지 않으신 이유는 무엇입니까? (복수 응답 가능)

- ① 소속된 의료기관에서 구매/제공해 주지 않아서
- ② 인공지능 의료기기 구매 비용이 과다해서
- ③ 인공지능 의료기기 구매/설치 과정이 번거로워서
- ④ 인공지능 의료기기의 사용이 불편할 것 같아서
- ⑤ 인공지능 의료기기의 사용이 진료에 도움이 될 것 같지 않아서
- ⑥ 인공지능 사용으로 인한 악영향에 대한 우려 때문에(임상 진료과나 환자의 문의/민원 증가, 인공지능의 과다한 위양성, 영상 수 증가로 인한 불편 등)
- ⑦ 기타: \_\_\_\_\_

2-2. 향후 인공지능 영상 분석 의료기기를 진료에 사용하실 의사가 있으십니까?

- ① 현재도 인공지능 의료기기를 사용할 의사가 있음
- ② 현재 상황에서는 의사가 없으나 인공지능 의료기기의 성능 및 사용 환경이 개선된다면 사용할 의사가 있음
- ③ 향후 인공지능 의료기기를 사용할 의사가 없음

**Part 3 (공통 질문)으로**

**Part 3 (공통 질문)**

3-1. 인공지능 영상 분석 의료기기를 진료에 적용하기 위하여 반드시 해결, 개선되어야 할 부분은 무엇이라고 생각하십니까?

(복수 응답 가능, 최대 3개)

- ① 인공지능 의료기기의 성능 개선
- ② PACS와의 통합을 통한 사용 편의성 개선
- ③ 연구를 통한 인공지능의 유용성에 대한 높은 수준의 근거 확립
- ④ 인공지능 의료기기 사용에 대한 수가 보상
- ⑤ 인공지능 의료기기 가격 현실화
- ⑥ 인공지능 의료기기를 사용한 진료에 대한 법적 책임 소재 문제 해결
- ⑦ 기타: \_\_\_\_\_



3-2. 인공지능 의료기기의 임상 적용이 보다 확대되어야 하는 분야는 다음 중 무엇이라고 생각하십니까?

(복수 응답 가능, 최대 4개)

- ① 병변 검출/추정 진단 제공 등을 통한 판독 보조
- ② 병변/장기 자동 측정 및 정량화를 통한 판독 보조 및 정량적 정보 제공
- ③ 정상 검사 등 일부 검사에 대한 자동 판독을 통한 업무 부담 감소
- ④ 영상 화질 개선
- ⑤ 영상 촬영 속도 단축
- ⑥ 판독 우선순위 부여
- ⑦ 판독 오류 스크리닝 등을 통한 질 관리
- ⑧ 기타: \_\_\_\_\_

3-3. 향후 인공지능 의료기기의 개발/발전에 있어 주안점을 두어야 할 부분은 다음 중 무엇이라고 생각하십니까?

(복수 응답 가능, 최대 3개)

- ① 진료(판독)의 정확도, 질 향상
- ② 진료(판독)의 효율성, 속도 개선 및 업무 부담 경감
- ③ 영상 화질 개선
- ④ 자동 측정, 정량화를 통한 기존에 제공하기 어려웠던 정보 제공
- ⑤ 환자 진료 체계 개선
- ⑥ 연구에 활용
- ⑦ 기타: \_\_\_\_\_

3-4. 의료 영상 분석 인공지능 의료기기의 진료 적용에 대한 학회 차원의 교육 및 가이드라인이 필요하다고 생각하십니까?

- ① 그렇다(→ 3-4-1. 문항으로)
- ② 아니다(→ 3-5. 문항으로)

3-4-1. 의료 영상 분석 인공지능 의료기기의 진료 적용에 대한 학회 차원의 교육 및 가이드라인에 포함되어야 할 내용은 무엇이라고 생각하십니까? (복수 응답 가능)

- ① 진료/연구에 이용 가능한 인공지능 의료기기 소개
- ② 다양한 인공지능 의료기기의 성능에 대한 객관적 정보 제공
- ③ 다양한 인공지능 의료기기 구매/설치/사용의 구체적 경험 공유
- ④ 주요 적용 시나리오에 따른 인공지능 의료기기의 유용성, 활용 여부에 대한 권고안
- ⑤ 주요 적용 시나리오에 따른 인공지능 구매/설치/사용 방법에 대한 가이드라인
- ⑥ 기타: \_\_\_\_\_

3-5. 인공지능 의료기기의 진료 적용과 관련하여 학회에 바라는 점이나 건의 사항이 있다면 자유롭게 답해 주십시오.

---

---

---

설문에 응답해 주셔서 대단히 감사합니다.

**Supplementary Table 1.** Artificial intelligence-based software as medical devices approved for clinical use by Korean Ministry of Food and Drug Safety between 1998 and 2022, summarized by target examination

| Target examination                 | Count |
|------------------------------------|-------|
| CT                                 | 46    |
| Chest CT                           | 17    |
| General or unspecified             | 10    |
| Brain CT                           | 9     |
| Abdomen CT                         | 6     |
| Coronary artery calcium scoring CT | 1     |
| Extremity CT                       | 1     |
| CT angiography                     | 1     |
| Spine CT                           | 1     |
| Plain radiography                  | 30    |
| Chest radiography                  | 14    |
| Bone age                           | 7     |
| Extremity radiography              | 6     |
| Spine radiography                  | 3     |
| MRI                                | 24    |
| Brain MRI                          | 9     |
| General                            | 5     |
| Cardiac MRI                        | 4     |
| Spine MRI                          | 2     |
| Prostate MRI                       | 2     |
| Breast MRI                         | 1     |
| Knee MRI                           | 1     |
| Ultrasonography                    | 6     |
| Fetal ultrasonography              | 2     |
| Breast ultrasonography             | 1     |
| Abdominal ultrasonography          | 1     |
| General                            | 1     |
| Echocardiography                   | 1     |
| Mammography                        | 4     |
| Coronary angiography               | 2     |
| Total                              | 112   |

All information is from the 2022 Medical Device Approval Report from the Korean Ministry of Food and Drug Safety [12] (the reference in the supplementary refer to the reference number in the main manuscript)

**Supplementary Table 2.** Artificial intelligence-based software as medical devices approved for clinical use by Korean Ministry of Food and Drug Safety between 1998 and 2022, summarized by use case

| Use case                                  | Count |
|-------------------------------------------|-------|
| CT                                        | 46    |
| Assistance of detection or diagnosis      | 15    |
| Automated segmentation and quantification | 28    |
| Image quality improvement                 | 3     |
| Plain radiography                         | 30    |
| Assistance of detection or diagnosis      | 27    |
| Automated segmentation and quantification | 3     |
| MRI                                       | 24    |
| Assistance of detection or diagnosis      | 7     |
| Automated segmentation and quantification | 11    |
| Scan time reduction                       | 4     |
| Image quality improvement                 | 1     |
| Generation of images mimicking CT images  | 1     |
| Ultrasonography                           | 6     |
| Assistance of detection or diagnosis      | 2     |
| Automated segmentation and quantification | 4     |
| Mammography                               | 4     |
| Assistance of detection or diagnosis      | 4     |
| Coronary angiography                      | 2     |
| Assistance of detection or diagnosis      | 2     |
| Total                                     | 112   |

All information is from the 2022 Medical Device Approval Report from the Korean Ministry of Food and Drug Safety [12] (the reference in the supplementary refer to the reference number in the main manuscript)

**Supplementary Table 3.** Currently used artificial intelligence-based software as medical devices reported by respondents according to target examination

| Target image modality                                       | Count |
|-------------------------------------------------------------|-------|
| Chest radiography                                           | 152   |
| Brain MRI                                                   | 71    |
| Chest CT                                                    | 63    |
| Mammography                                                 | 59    |
| MRI acquisition time reduction or image quality improvement | 27    |
| CT image quality improvement                                | 17    |
| Brain CT                                                    | 16    |
| Bone age                                                    | 15    |
| Breast ultrasonography                                      | 9     |
| General image processing                                    | 8     |
| Spine radiography                                           | 6     |
| Voice recognition                                           | 4     |
| Coronary artery calcium scoring CT                          | 3     |
| CT body composition analysis                                | 3     |
| Cardiac MRI                                                 | 3     |
| Breast MRI                                                  | 2     |
| Foot radiography                                            | 1     |
| Digital breast tomosynthesis                                | 1     |
| Unknown/unclassifiable                                      | 13    |

**Supplementary Table 4.** Subgroup analyses: level of satisfaction of using AI-SaMDs

|                                                                                         | Very satisfactory | Satisfactory | Unsatisfactory | Very unsatisfactory | Not applicable |
|-----------------------------------------------------------------------------------------|-------------------|--------------|----------------|---------------------|----------------|
| <b>Performance and reliability</b>                                                      |                   |              |                |                     |                |
| Residency trainees or < 5 years of experience as a board-certified radiologist (n = 74) | 11 (14.9)         | 54 (73.0)    | 8 (10.8)       | 1 (1.4)             | 0 (0)          |
| 5–15 years of experience as a board-certified radiologist (n = 77)                      | 9 (11.7)          | 58 (75.3)    | 7 (9.1)        | 2 (2.6)             | 1 (1.3)        |
| ≥ 15 years of experience as a board-certified radiologist (n = 72)                      | 16 (22.2)         | 41 (56.9)    | 15 (20.8)      | 0 (0)               | 0 (0)          |
| < 1 year of AI-SaMD usage (n = 114)                                                     | 14 (12.3)         | 77 (67.5)    | 20 (17.5)      | 2 (1.8)             | 1 (0.9)        |
| ≥ 1 year of AI-SaMD usage (n = 109)                                                     | 22 (20.2)         | 76 (69.7)    | 10 (9.2)       | 1 (0.9)             | 0 (0)          |
| <b>Convenience for use</b>                                                              |                   |              |                |                     |                |
| Residency trainees or < 5 years of experience as a board-certified radiologist (n = 74) | 24 (32.4)         | 44 (59.5)    | 5 (6.8)        | 1 (1.4)             | 0 (0)          |
| 5–15 years of experience as a board-certified radiologist (n = 77)                      | 16 (20.8)         | 48 (62.3)    | 10 (13.0)      | 2 (2.6)             | 1 (1.3)        |
| ≥ 15 years of experience as a board-certified radiologist (n = 72)                      | 17 (23.6)         | 35 (48.6)    | 16 (22.2)      | 3 (4.2)             | 1 (1.4)        |
| < 1 year of AI-SaMD usage (n = 114)                                                     | 26 (22.8)         | 61 (53.5)    | 21 (18.4)      | 4 (3.5)             | 2 (1.8)        |
| ≥ 1 year of AI-SaMD usage (n = 109)                                                     | 31 (28.4)         | 66 (60.6)    | 10 (9.2)       | 2 (1.8)             | 0 (0)          |
| <b>Improvement of practice quality</b>                                                  |                   |              |                |                     |                |
| Residency trainees or < 5 years of experience as a board-certified radiologist (n = 74) | 12 (16.2)         | 46 (62.2)    | 14 (18.9)      | 1 (1.4)             | 1 (1.4)        |
| 5–15 years of experience as a board-certified radiologist (n = 77)                      | 11 (14.3)         | 44 (57.1)    | 19 (24.7)      | 1 (1.3)             | 2 (2.6)        |
| ≥ 15 years of experience as a board-certified radiologist (n = 72)                      | 15 (20.8)         | 40 (55.6)    | 14 (19.4)      | 0 (0)               | 3 (4.2)        |
| < 1 year of AI-SaMD usage (n = 114)                                                     | 16 (14.0)         | 63 (55.3)    | 31 (27.2)      | 1 (0.9)             | 3 (2.6)        |
| ≥ 1 year of AI-SaMD usage (n = 109)                                                     | 22 (20.2)         | 67 (61.5)    | 16 (14.7)      | 1 (0.9)             | 3 (2.8)        |
| <b>Improvement of practice efficiency</b>                                               |                   |              |                |                     |                |
| Residency trainees or < 5 years of experience as a board-certified radiologist (n = 74) | 16 (21.6)         | 37 (50.0)    | 14 (18.9)      | 2 (2.7)             | 5 (6.7)        |
| 5–15 years of experience as a board-certified radiologist (n = 77)                      | 14 (18.2)         | 40 (51.9)    | 15 (19.5)      | 5 (6.5)             | 3 (3.9)        |
| ≥ 15 years of experience as a board-certified radiologist (n = 72)                      | 20 (27.8)         | 30 (41.7)    | 18 (25.0)      | 2 (2.8)             | 2 (2.8)        |
| < 1 year of AI-SaMD usage (n = 114)                                                     | 21 (18.4)         | 55 (48.2)    | 25 (21.9)      | 9 (7.9)             | 4 (3.5)        |
| ≥ 1 year of AI-SaMD usage (n = 109)                                                     | 29 (26.6)         | 52 (47.7)    | 22 (20.2)      | 0 (0)               | 6 (5.5)        |
| <b>Quantitative image analysis</b>                                                      |                   |              |                |                     |                |
| Residency trainees or < 5 years of experience as a board-certified radiologist (n = 74) | 4 (5.4)           | 38 (51.4)    | 16 (21.6)      | 5 (6.8)             | 11 (14.9)      |
| 5–15 years of experience as a board-certified radiologist (n = 77)                      | 16 (20.8)         | 40 (51.9)    | 10 (13.0)      | 4 (5.2)             | 7 (9.1)        |
| ≥ 15 years of experience as a board-certified radiologist (n = 72)                      | 15 (20.8)         | 32 (44.4)    | 11 (15.3)      | 2 (2.8)             | 12 (16.7)      |
| < 1 year of AI-SaMD usage (n = 114)                                                     | 14 (12.3)         | 57 (50.0)    | 25 (21.9)      | 7 (6.1)             | 11 (9.6)       |
| ≥ 1 year of AI-SaMD usage (n = 109)                                                     | 21 (19.3)         | 53 (48.6)    | 12 (11.0)      | 4 (3.7)             | 19 (17.4)      |
| <b>Improvement of patient management</b>                                                |                   |              |                |                     |                |
| Residency trainees or < 5 years of experience as a board-certified radiologist (n = 74) | 5 (6.8)           | 38 (51.4)    | 11 (14.9)      | 3 (4.1)             | 17 (23.0)      |
| 5–15 years of experience as a board-certified radiologist (n = 77)                      | 10 (13.0)         | 29 (37.7)    | 16 (20.8)      | 6 (7.8)             | 16 (20.8)      |
| ≥ 15 years of experience as a board-certified radiologist (n = 72)                      | 12 (16.7)         | 21 (29.2)    | 18 (25.0)      | 1 (1.4)             | 20 (27.8)      |
| < 1 year of AI-SaMD usage (n = 114)                                                     | 12 (10.5)         | 48 (42.1)    | 25 (21.9)      | 8 (7.0)             | 21 (18.4)      |
| ≥ 1 year of AI-SaMD usage (n = 109)                                                     | 15 (13.8)         | 40 (36.7)    | 20 (18.3)      | 2 (1.8)             | 32 (29.4)      |
| <b>Improvement of image quality</b>                                                     |                   |              |                |                     |                |
| Residency trainees or < 5 years of experience as a board-certified radiologist (n = 74) | 7 (9.5)           | 23 (31.1)    | 4 (5.4)        | 5 (6.8)             | 35 (31.1)      |
| 5–15 years of experience as a board-certified radiologist (n = 77)                      | 6 (7.8)           | 26 (33.8)    | 12 (15.6)      | 3 (3.9)             | 30 (39.0)      |
| ≥ 15 years of experience as a board-certified radiologist (n = 72)                      | 9 (12.5)          | 13 (18.1)    | 12 (16.7)      | 1 (1.4)             | 37 (51.4)      |
| < 1 year of AI-SaMD usage (n = 114)                                                     | 9 (7.9)           | 36 (31.6)    | 18 (15.8)      | 6 (5.3)             | 45 (39.5)      |
| ≥ 1 year of AI-SaMD usage (n = 109)                                                     | 13 (11.9)         | 26 (23.9)    | 10 (9.2)       | 3 (2.8)             | 57 (52.3)      |
| <b>Research purpose</b>                                                                 |                   |              |                |                     |                |
| Residency trainees or < 5 years of experience as a board-certified radiologist (n = 74) | 9 (12.2)          | 34 (45.9)    | 7 (9.5)        | 1 (1.4)             | 23 (31.1)      |
| 5–15 years of experience as a board-certified radiologist (n = 77)                      | 14 (18.2)         | 38 (49.4)    | 7 (9.1)        | 3 (3.9)             | 15 (19.5)      |
| ≥ 15 years of experience as a board-certified radiologist (n = 72)                      | 23 (31.9)         | 18 (25.0)    | 6 (8.3)        | 1 (1.4)             | 24 (33.3)      |
| < 1 year of AI-SaMD usage (n = 114)                                                     | 16 (14.0)         | 50 (43.9)    | 14 (12.3)      | 3 (2.6)             | 31 (27.2)      |
| ≥ 1 year of AI-SaMD usage (n = 109)                                                     | 30 (27.5)         | 40 (36.7)    | 6 (5.5)        | 2 (1.8)             | 31 (28.4)      |

All values indicate the number of respondents, with percentage frequencies of responses in parentheses.

AI-SaMD = artificial intelligence-based software as medical device

**Supplementary Table 5.** Subgroup analyses: demands for the expansion of applications of AI-SaMDs

|                                                                                          | Assistance for detection and diagnosis | Automated measurement and quantification | Workload reduction through automated interpretation | Quality control through the screening of errors | Image quality improvement | Reduction of image acquisition time | Prioritization of interpretation |
|------------------------------------------------------------------------------------------|----------------------------------------|------------------------------------------|-----------------------------------------------------|-------------------------------------------------|---------------------------|-------------------------------------|----------------------------------|
| Residency trainees or < 5 years of experience as a board-certified radiologist (n = 118) | 90 (76.3)                              | 75 (63.6)                                | 43 (36.4)                                           | 49 (41.5)                                       | 34 (28.8)                 | 20 (16.9)                           | 36 (30.5)                        |
| 5–15 years of experience as a board-certified radiologist (n = 138)                      | 104 (75.4)                             | 85 (61.6)                                | 63 (45.7)                                           | 49 (35.5)                                       | 49 (35.5)                 | 16 (11.6)                           | 35 (25.4)                        |
| ≥ 15 years of experience as a board-certified radiologist (n = 114)                      | 91 (79.8)                              | 75 (65.8)                                | 64 (56.1)                                           | 53 (46.5)                                       | 32 (28.1)                 | 10 (8.8)                            | 37 (32.5)                        |
| Affiliated to tertiary, training institution (n = 210)                                   | 158 (75.2)                             | 131 (62.4)                               | 101 (48.1)                                          | 84 (40.0)                                       | 73 (34.8)                 | 38 (18.1)                           | 74 (35.2)                        |
| Affiliated to tertiary, non-training institution (n = 39)                                | 26 (66.7)                              | 25 (64.1)                                | 17 (43.6)                                           | 14 (35.9)                                       | 9 (23.1)                  | 6 (15.4)                            | 8 (20.5)                         |
| Affiliated to secondary institution (n = 66)                                             | 55 (83.3)                              | 46 (69.7)                                | 32 (48.5)                                           | 29 (43.9)                                       | 15 (22.7)                 | 9 (13.6)                            | 7 (10.6)                         |
| Affiliated to primary institution (n = 28)                                               | 27 (96.4)                              | 17 (60.7)                                | 12 (42.9)                                           | 11 (39.3)                                       | 5 (17.9)                  | 3 (10.7)                            | 5 (17.9)                         |
| Affiliated to military or public healthcare service (n = 15)                             | 8 (53.3)                               | 7 (46.7)                                 | 4 (26.7)                                            | 6 (40.0)                                        | 7 (46.7)                  | 6 (40.0)                            | 9 (60.0)                         |
| General radiology (n = 130)                                                              | 110 (84.6)                             | 79 (60.8)                                | 57 (46.8)                                           | 58 (44.6)                                       | 34 (26.2)                 | 16 (12.3)                           | 32 (24.6)                        |
| Musculoskeletal radiology (n = 74)                                                       | 56 (75.7)                              | 48 (64.9)                                | 30 (40.5)                                           | 24 (32.4)                                       | 21 (28.4)                 | 21 (28.4)                           | 15 (20.3)                        |
| Abdominal radiology (n = 55)                                                             | 42 (76.4)                              | 39 (70.9)                                | 26 (47.3)                                           | 29 (52.7)                                       | 18 (32.7)                 | 10 (18.2)                           | 19 (34.5)                        |
| Neuroradiology (n = 48)                                                                  | 32 (66.7)                              | 33 (68.8)                                | 16 (33.3)                                           | 15 (31.3)                                       | 23 (47.9)                 | 13 (27.1)                           | 12 (25.0)                        |
| Breast radiology (n = 41)                                                                | 32 (78.0)                              | 27 (65.9)                                | 21 (51.2)                                           | 23 (56.1)                                       | 10 (24.4)                 | 2 (4.9)                             | 11 (26.8)                        |
| Chest radiology (n = 39)                                                                 | 30 (76.9)                              | 21 (53.8)                                | 24 (61.5)                                           | 17 (43.6)                                       | 9 (23.1)                  | 4 (10.3)                            | 12 (30.8)                        |
| Cardiovascular radiology (n = 22)                                                        | 17 (77.3)                              | 17 (77.3)                                | 11 (50.0)                                           | 11 (50.0)                                       | 4 (18.2)                  | 2 (9.1)                             | 5 (22.7)                         |
| Interventional radiology (n = 21)                                                        | 16 (76.2)                              | 14 (66.7)                                | 11 (52.4)                                           | 9 (42.9)                                        | 4 (19.0)                  | 2 (9.5)                             | 6 (28.6)                         |
| Genitourinary radiology (n = 16)                                                         | 13 (81.3)                              | 13 (81.3)                                | 10 (62.5)                                           | 11 (68.8)                                       | 5 (31.3)                  | 1 (6.3)                             | 5 (31.3)                         |
| Pediatric radiology (n = 8)                                                              | 6 (75.0)                               | 6 (75.0)                                 | 5 (62.5)                                            | 6 (75.0)                                        | 2 (25.0)                  | 2 (25.0)                            | 1 (12.5)                         |
| Respondents with experience of AI-SaMD usage (n = 223)                                   | 168 (75.3)                             | 147 (65.9)                               | 96 (43.0)                                           | 83 (37.2)                                       | 74 (33.2)                 | 42 (18.8)                           | 65 (29.1)                        |
| < 1 year of AI-SaMD usage (n = 114)                                                      | 79 (69.3)                              | 72 (63.2)                                | 45 (39.5)                                           | 35 (30.7)                                       | 35 (30.7)                 | 25 (21.9)                           | 34 (29.8)                        |
| ≥ 1 year of AI-SaMD usage (n = 109)                                                      | 89 (81.7)                              | 75 (68.8)                                | 51 (46.8)                                           | 48 (44.0)                                       | 39 (35.8)                 | 47 (43.1)                           | 31 (28.4)                        |
| Respondent without experience of AI-SaMD usage (n = 147)                                 | 117 (79.6)                             | 88 (59.9)                                | 74 (50.3)                                           | 68 (46.3)                                       | 41 (27.9)                 | 21 (14.3)                           | 43 (29.3)                        |

All values indicate the number of respondents, with percentage frequencies of responses in parentheses.  
AI-SaMD = artificial intelligence-based software as medical device
